# Supplementary material for: Cathepsin S Activity Controls Injury-Related Vascular Repair in Mice via the TLR2-Mediated p38MAPK and PI3K−Akt/p-HDAC6 Signaling Pathway
Source: PubMed Central journal article supplement — Arterioscler Thromb Vasc Biol. 2016 Jul 27;36(8):1549–57. doi: 10.1161/ATVBAHA.115.307110 (PMC4961274; doi:10.1161/atvbaha.115.307110), 2016-07-27

**Supplemental Table I.** Plasma PDGF-BB concentrations were detected in CatS<sup>+/+</sup> and CatS<sup>-/-</sup> mice followed ligation injury in the indicated days

| Day after ligation injury | Group               | Number | PDGF-BB (pg/mL)        |
|---------------------------|---------------------|--------|------------------------|
| day 0                     | CatS <sup>+/+</sup> | 8      | 45.8±2.1               |
|                           | CatS <sup>-/-</sup> | 8      | 49.9±5.6               |
| day 4                     | CatS <sup>+/+</sup> | 9      | 128.0±7.6 <sup>*</sup> |
|                           | CatS <sup>-/-</sup> | 9      | 61.6±7.4 <sup>†</sup>  |
| day 28                    | CatS <sup>+/+</sup> | 11     | 81.7±20.2              |
|                           | CatS <sup>-/-</sup> | 9      | 60.7±12.1              |
| day 14                    | Control             | 7      | 132.7±25.8             |
|                           | Tubastatin A        | 6      | 85.7±16.2              |

All of the results are presented as mean ± SEM. <sup>\*</sup>P <0.01 vs CatS<sup>+/+</sup> mice group in day 0; <sup>†</sup>P <0.01 vs CatS<sup>+/+</sup> mice group in day 4.

**Supplemental Table II. Primer sequences used in the quantitative real-time PCR**

| Gene           | Forward primer (5' to 3') | Reverse primer (5' to 3') | GenBank no.      |
|----------------|---------------------------|---------------------------|------------------|
| MCP-1          | GCCCCACTCACCTGCTGCTACT    | CCTGCTGCTGGTGATCCTCTTGT   | NM_011333        |
| TLR2           | AAGAAGCTGGCATTCCGAGGC     | CGTCTGACTCCGAGGGGTTGA     | NM_011905        |
| TLR4           | AGTGGGTCAAGGAACAGAAGCA    | CTTTACCAGCTCATTCTCACC     | <u>NM_021297</u> |
| CatS           | GTGGCCACTAAAGGGCCTG       | ACCGCTTTTGTAGAAGAAGAAGGAG | <u>NM_021281</u> |
| CatK           | AGCAGGCTGGAGGACTAAGGT     | TTTGTGCATCTCAGTGGAAGACT   | NM_007802        |
| Cystatin C     | AACAAGGGCAGCAACGATG       | CGAGCTGCTTACGAGCTCTCAC    | <u>NM_009976</u> |
| HDAC1          | TCTGAATACAGCAAGCAGATGCA   | ACAGAACTCAAACAAGCCATCAAAC | <u>NM_008228</u> |
| HDAC2          | AGAAGATTGTCCGGTGTTTGATG   | CACAGCCCCAGCAACTGAA       | <u>NM_008229</u> |
| HDAC3          | TCAGCCCCACCAATATGCA       | GAACTCGAAAAGTCCTGGAAACA   | <u>NM_010411</u> |
| HDAC4          | CTGGCATCCCTGTGTCATTTG     | ACACAAGACCTGTGGTGAACCTT   | <u>NM_207225</u> |
| HDAC5          | GCAACAAGGAGAAGAGCAAAGAG   | TCCTGGAGCCTCAGCTTTACC     | <u>NM_010412</u> |
| HDAC6          | GCTGAGGGAGCCTGGTTAAA      | AGGACTGCCCCTTTTCGATCA     | NM_010413        |
| HDAC7          | CCCACCTGTCAGACCCAAGT      | AGTCATAGACCAGCCCTGTAGCA   | <u>NM_019572</u> |
| HDAC8          | AGGTACAATCACAGCTGCCC      | TCTTTGCATGATGCCACCCT      | NM_027382        |
| HDAC9          | TGGCAGAATCCTCGGTCAGT      | CCCAGCAGGGCCATTGT         | <u>NM_024124</u> |
| HIF-1 $\alpha$ | GCAGCAGGAATTGGAACATT      | GCATGCTAAATCGGAGGGTA      | NM_176958        |
| GAPDH          | ATGTGTCCGTCTGGATCTGA      | ATGCCTGCTTCACCACCTTCT     | <u>NM_008084</u> |

**Supplemental Fig. I. Ligation injuries induced CatS expression in carotid arteries.**

**A:** The mRNA levels of CatS were increased greatly in ligated arteries over those of the uninjured control vessels of CatS<sup>+/+</sup> mice on day 1, day 2, day 4, day 14 and day 28 after ligation injury (n=4–8). **B:** The representative image and quantitative data of CatS protein expression on day 4 after ligation (n=5). **C:** PCR bands show the image of the genotyping used CatS<sup>+/+</sup> and CatS<sup>-/-</sup> mice tails. **D:** Western blots images show the levels of CatS protein in the CatS<sup>+/+</sup> and CatS<sup>-/-</sup> VSMCs.

**Supplemental Fig. II. CatS<sup>-/-</sup> decreases inflammatory reaction in injured arteries.**

The quantitative PCR revealed that the lesions in CatS<sup>-/-</sup> mice that received a ligation injury had lower mRNA levels of TLR2 (**A**) as well as MCP-1 (**B**), whereas TLR4 (**C**) exhibited no significant difference from the CatS<sup>+/+</sup> mice. There was no significant difference in the CatK (**D**) or Cystatin C (**E**) mRNA expressions between the CatS<sup>+/+</sup> and CatS<sup>-/-</sup> mice. **F:** Representative immunostaining images and quantitative data show TLR2<sup>+</sup> cells in injured arterial tissues of CatS<sup>+/+</sup> and CatS<sup>-/-</sup> mice (n=5). Triangles indicate TLR2<sup>+</sup> cells. **G:** Quantitative real-time PCR data revealed that the levels of HIF-1 $\alpha$  mRNA were increased in injured arterial tissues of CatS<sup>+/+</sup> mice (n= 5). **H:** Quantitative PCR revealed that the levels of HIF-1 $\alpha$  mRNA were lower in the lesions of CatS<sup>-/-</sup> mice compared to CatS<sup>+/+</sup> mice. Data are mean  $\pm$  SEM; Student's unpaired t-test.

**Supplemental Fig. III. HDAC6 mRNA expression on day 1 to day 4 following ligation in wild-type mice.**

**A:** HDAC1-9 mRNA expressions on day 4 after ligation injury. Left artery, no ligation side. Right artery, ligation side. n=7. **B:** HDAC6 mRNA expression on day 0, day 1, day 2 and day 4 following ligation in wild-type mice (n= 6-8). Data are mean  $\pm$  SEM, One-way ANOVA and Bonferroni post-hoc test.

**Supplemental Fig. IV. HDAC6 inhibition reduced HDAC6 phosphorylation.**

Representative image (**A**) and quantitative data (**B**) of the western blot show that tubastatin A (10  $\mu$ M) decreased the levels of pHDAC6 (n= 3). Data are mean  $\pm$  SEM, ANOVA and Bonferroni post hoc tests.

**Supplemental Fig. V. HDAC6 silencing decreased VSMC proliferation and migration.**

**A,** siHDAC6 inhibited PDGF-BB (10 ng/mL)-induced VSMC proliferation (n=5). **B,** The representative image and quantitative data show siHDAC6 mitigated PDGF-BB (50 ng/mL)-induced VSMC migration (n= 6). Data are mean  $\pm$  SEM, Student's unpaired t-test.

**Supplemental Fig. VI. Role of CatS in mitogen-induced VSMC proliferation and migration.** CatS inhibitor (CatS-I, 10  $\mu$ M, **A**) and CatS deficiency (CatS KO, **B**) inhibited the PDGF-BB (50 ng/mL)-induced VSMC proliferation (n=8). The representative image and quantitative data show that CatS inhibitor (CatS-I, 10  $\mu$ M) impaired PDGF-BB (50 ng/mL, **C**)- or 2% FBS (**D**)-induced VSMC migration. Data are mean  $\pm$  SEM, Student's unpaired t-test.

**Supplemental Fig. VII. CatS<sup>-/-</sup> impaired VSMC migration ex vivo.** **A:** Representative figures of VSMC migration from arterial explants from day 1 to day 7 in the two groups. The quantitative data show that the sprouting VSMC numbers (**B**) and cell sprouted area (**C**) were markedly decreased in the CatS<sup>-/-</sup> mice (n= 7). Data are mean  $\pm$  SEM, 2-way repeated measures ANOVA and Bonferroni post hoc tests.

**Supplemental Fig. VIII. p38MAPK/Akt signaling pathway-mediated regulation of HDAC6 activity in VSMCs.** Mouse aortic VSMCs were cultured in 10% FBS/DMEM medium and then subjected to serum-free medium for 12 h before the following treatment. Protein samples were isolated and used for a western blotting analysis as indicated. Representative immunoblots (**A**) and quantitative data (**B**) show the effect of PDGF-BB (20 ng/mL) on phosphorylation of HDAC6, p38MAPK, Akt, Erk1/2 in CatS<sup>+/+</sup> VSMCs (n=3). CatS<sup>+/+</sup> VSMCs were pretreated with or without p38MAPK inhibitor (SB203580, 20  $\mu$ M, **C**) or Akt inhibitor (10  $\mu$ M, **D**, **E**) for 30 min and then treated with or without PDGF-BB (20 ng/mL) for 10 min (n=4). Representative images and quantitative data show that SB203580 or Akt inhibitor decreased the levels of p-HDAC6 and/or p-eEF2 (n=4) Data are mean  $\pm$  SEM, 1-way, or 2-way ANOVA and Bonferroni post hoc tests.

**Supplemental Fig. IX. The effect of HDAC6 transfection on the expression of p-HDAC6.** Mouse VSMCs were transfected with control vector or HDAC6 plasmid for 48 h and then subjected to serum-free medium for 12 h before the following treatment. Protein samples were isolated and used for a western blotting analysis as indicated. **A:** Representative immunoblots and quantitative data show that VSMCs transfected with HDAC6 plasmid increased HDAC6 expression. **B:** Representative immunoblots and quantitative data show the effect of HDAC6 transfection on the levels of p-HDAC6 protein (n=3). Data are mean $\pm$ SEM; Student's paired t-test.

**Supplemental Fig. X. HDAC6 plasmid transfection increased the in vitro VSMC proliferation, migration, and cell-cycle progression.** VSMCs were transfected with control (vector) or HDAC6 plasmid (HDAC6) for 48–72 h and then used in the following experiments: **A:** Cells were treated with PDGF-BB (20 ng/mL) for 48 h, and cell proliferation was then measured by an MTS assay (n=8). **B:** Cells were scratched with a 1-ml pipet tip and cultured for 24 h with PDGF-BB (20 ng/mL, n=7). Representative immunoblots (**B**) and quantitative data (**C**) show that HDAC6 plasmid transfection increased the in vitro VSMC migration. **D,E:** The transfected cells were re-grown in a 6-well plate for 24 h and starved for 12 h before stimulation with 10% FBS for 36 h for the cell-cycle assay (n= 4). Distribution of cells in S/G2/M expressed as a percentage of total cells. Data are mean  $\pm$  SEM, Student's unpaired t-test.

**Supplemental Fig. XI. TLR2 silencing decreased not only the levels of p-HDAC6, p-p38MAPK and p-Akt and but also VSMC proliferation and migration.** Representative immunoblots (**A**) and quantitative data (**B**) show TLR2 silencing inhibited the levels of p-HDAC6, p-p38MAPK and p-Akt induced by PDGF-BB (20 ng/mL) for 10 min (n= 3). **C,** siTLR2 reduced VSMC proliferation in response to PDGF-BB (10 ng/mL, n= 5). **D,** Representative image and quantitative data show siTLR2 mitigated VSMC migration in response to PDGF-BB (50 ng/mL, n=6). Data are mean  $\pm$  SEM, Student's unpaired t-test.

**Supplemental Fig. XII. The proposed mechanism of ligation-induced vascular repair in mice.** TLR2, toll-like receptor 2; CatS, cathepsin S; PDGF-BB, platelet-derived growth factor BB; HDAC6, histone deacetylase 6; VSMC, vascular smooth muscle cell; HIF1 $\alpha$ , hypoxia-inducible factor 1 alpha.

# Sup. Fig. I

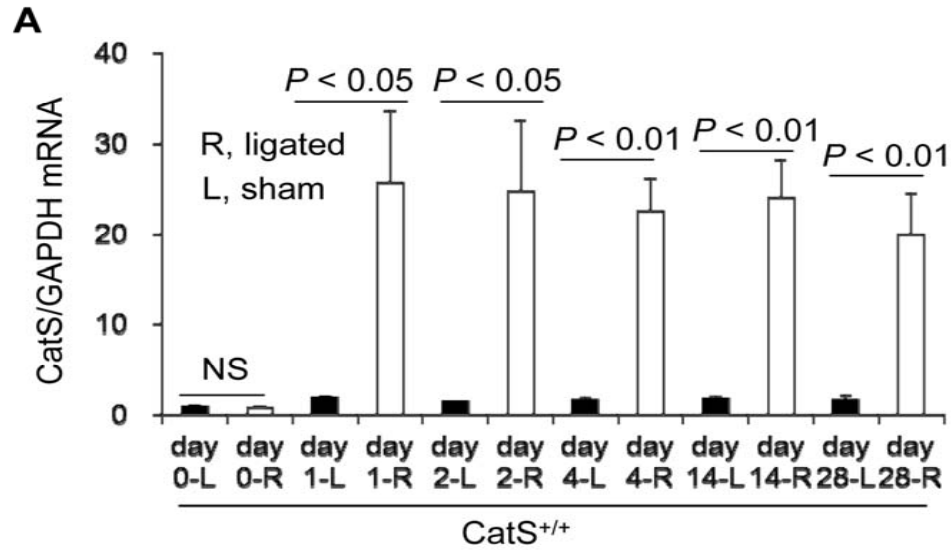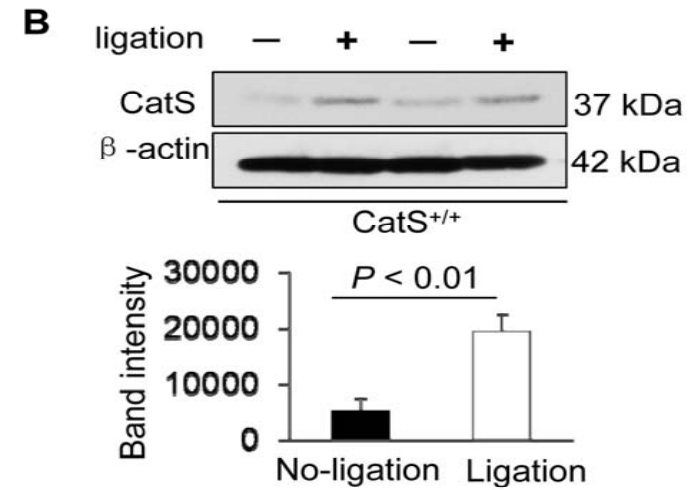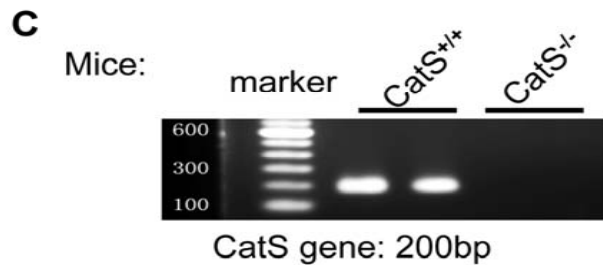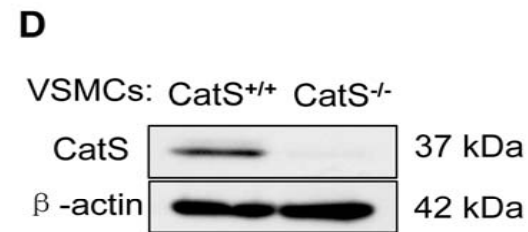

## Sup. Fig. II

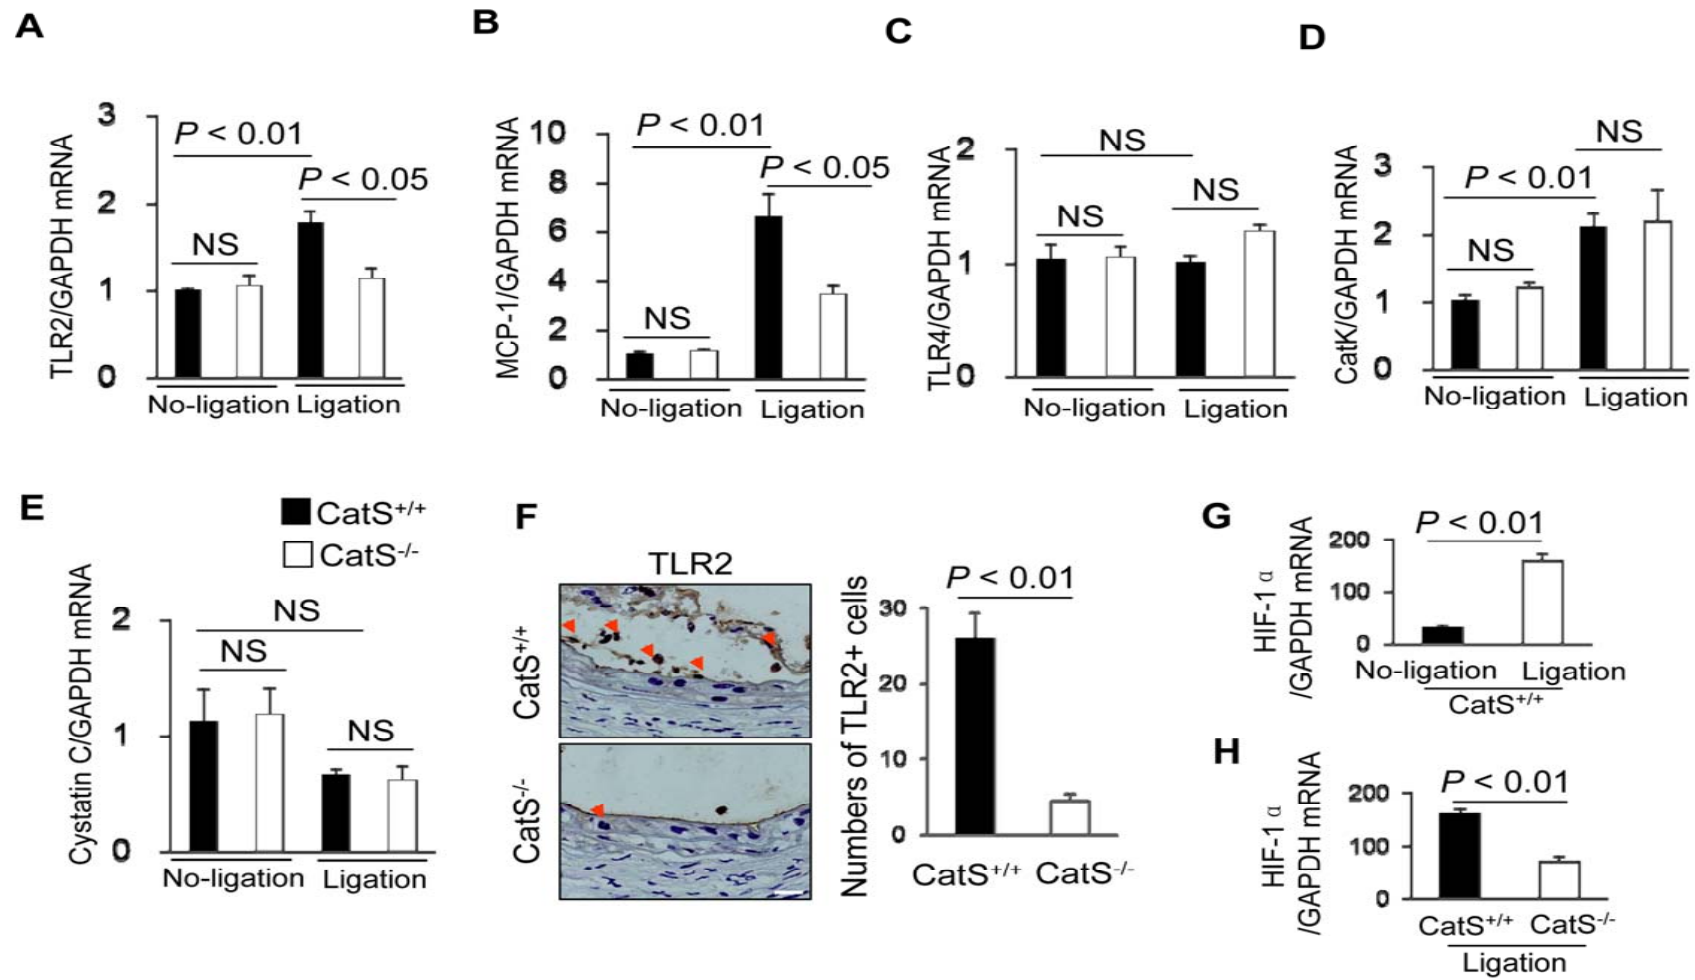

### Sup. Fig. III

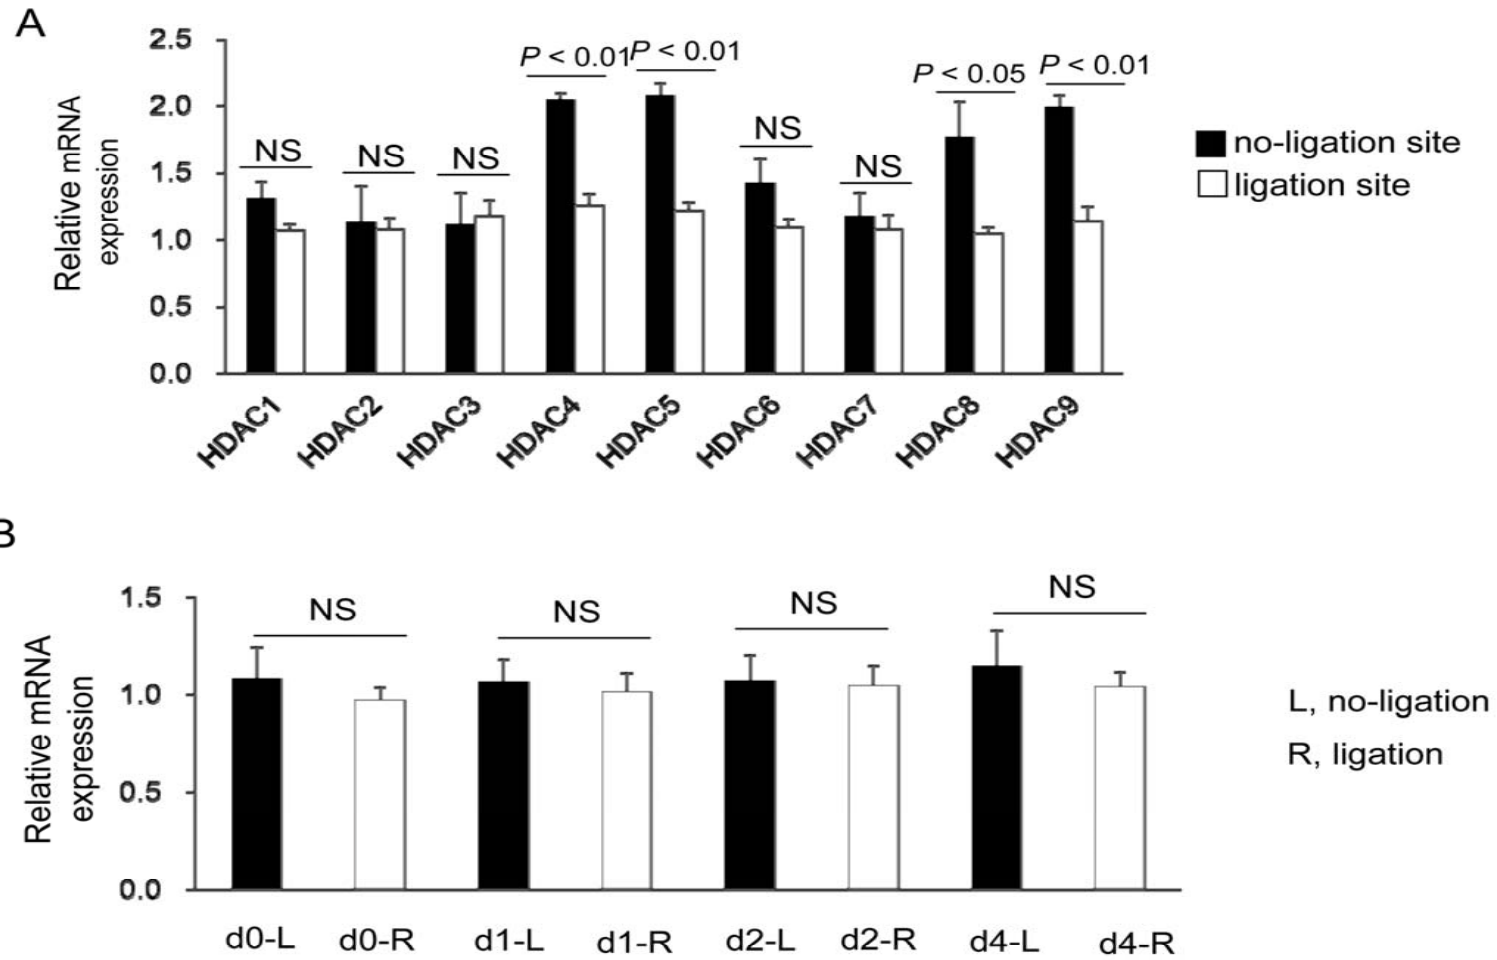



## Sup. Fig. IV

**A**

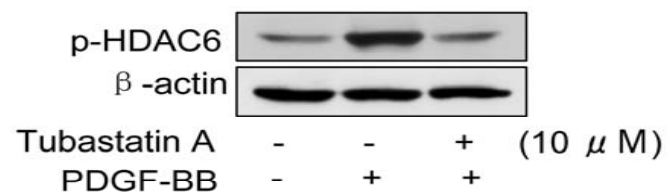

**B**

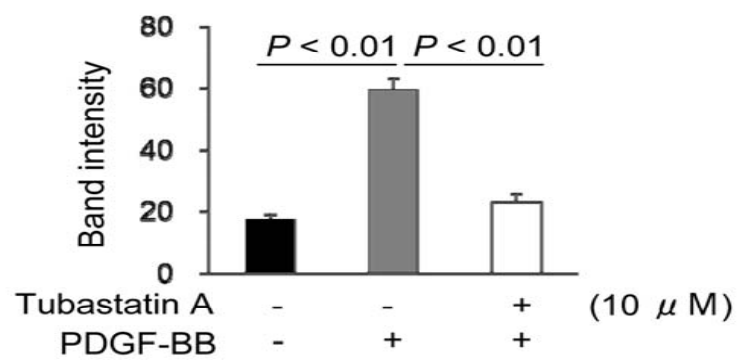

**Sup. Fig. V**

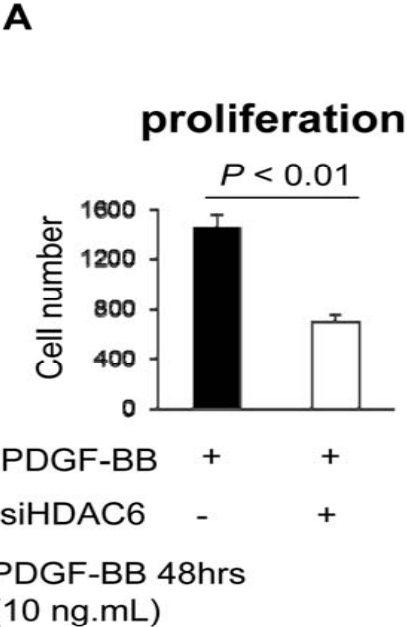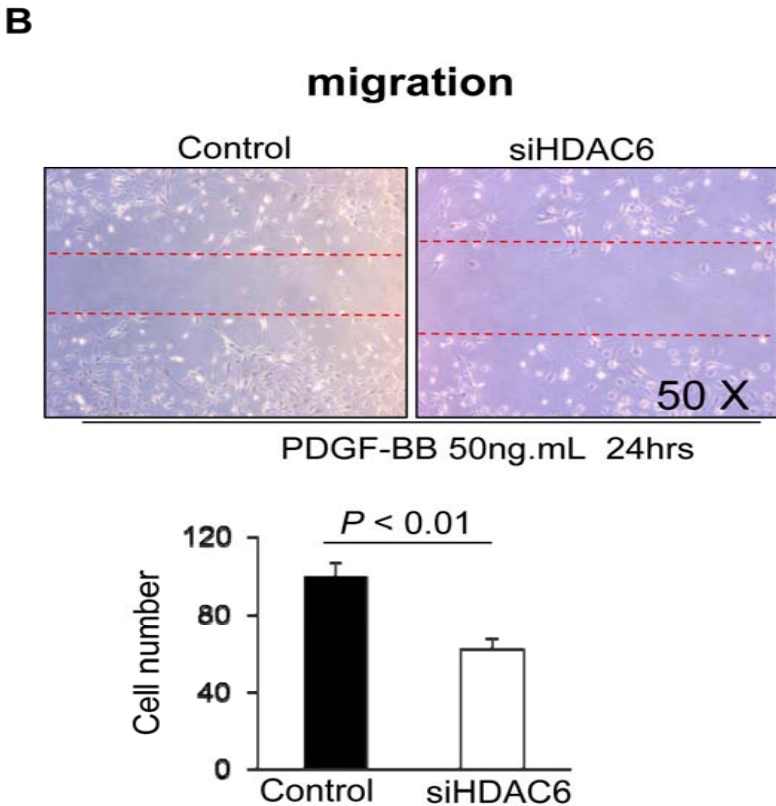

# Sup. Fig. VI

## A proliferation

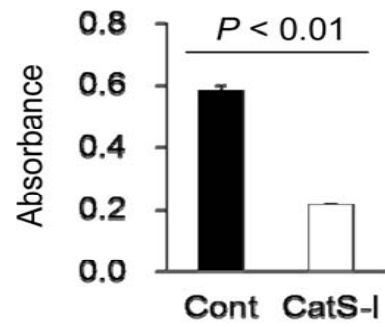

## B proliferation

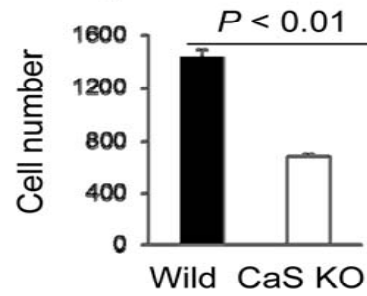

## C migration

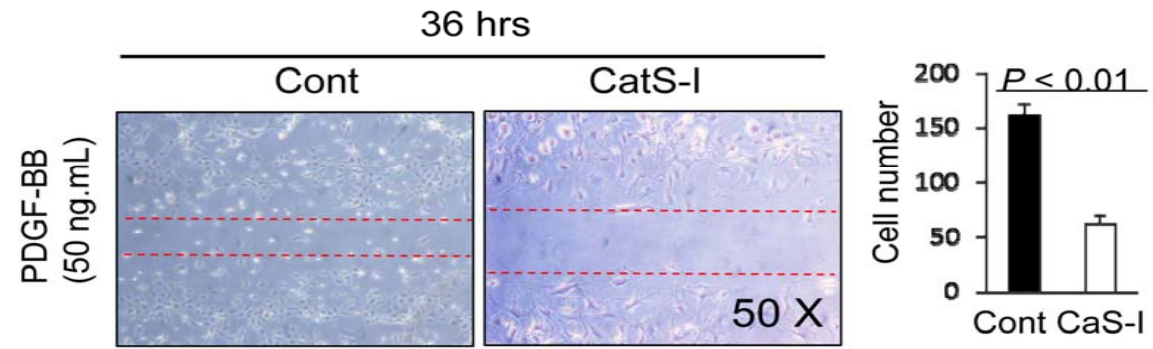

## D

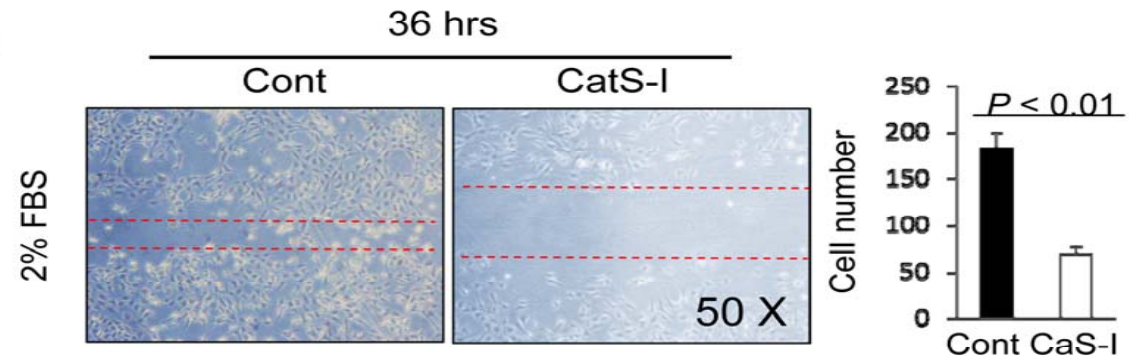

Sup. Fig. VII

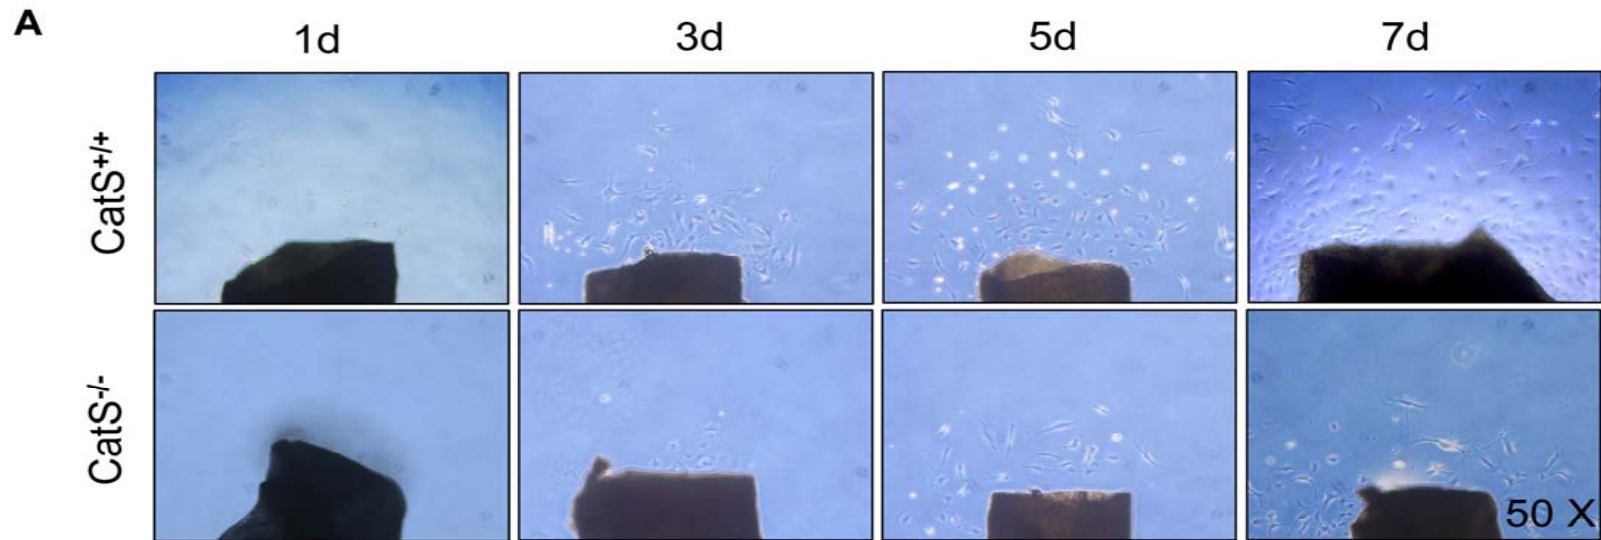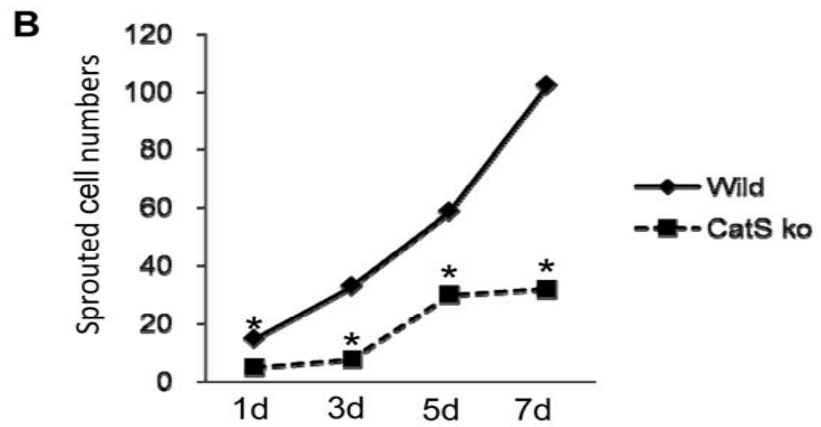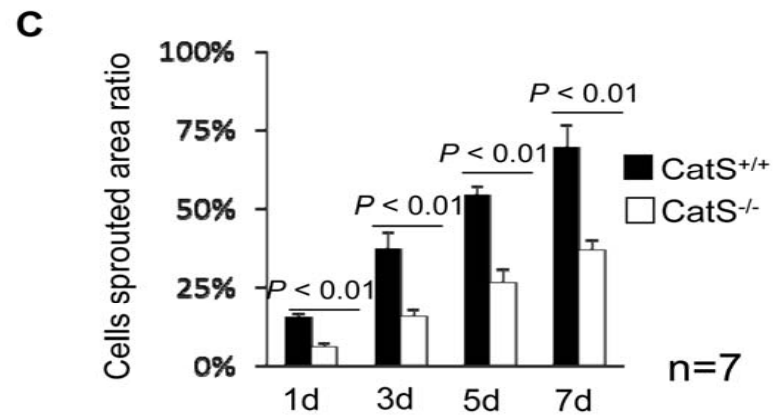

### Sup. Fig. VIII

**A**

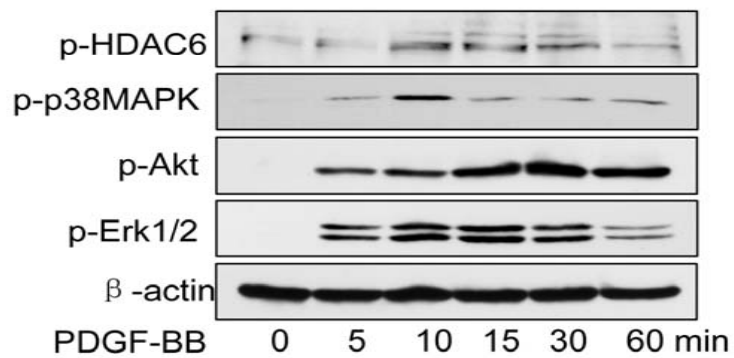

**B**

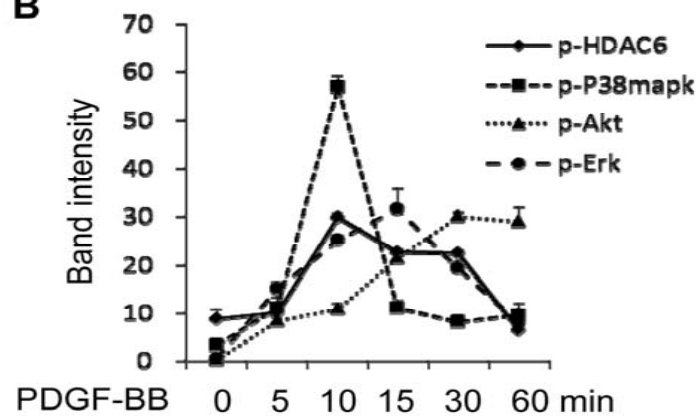

**C**

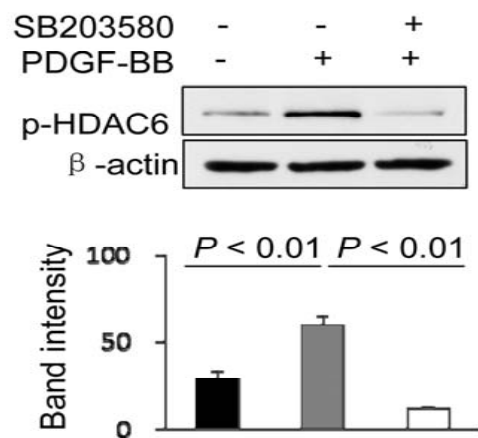

**D**

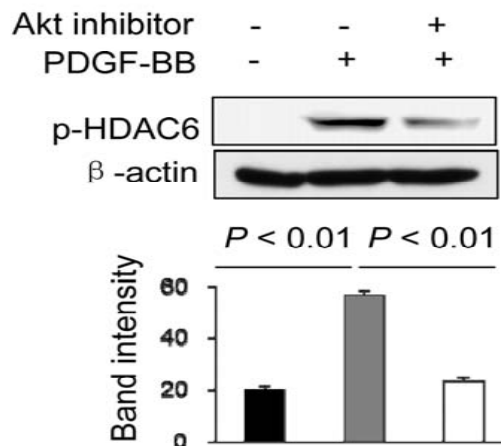

**E**

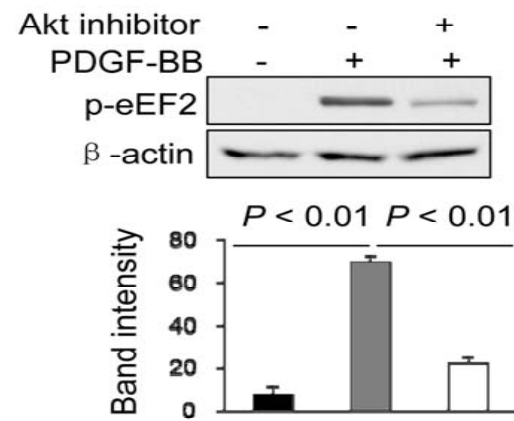

# Sup. Fig. IX

**A**

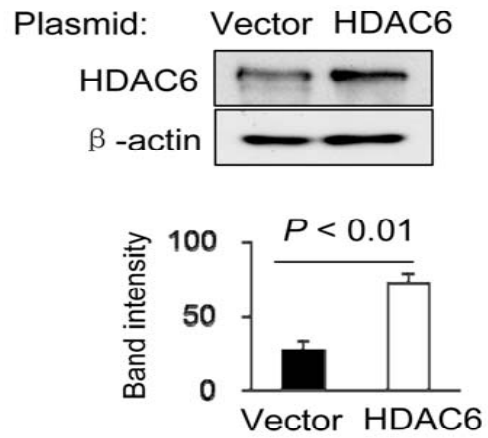

**B**

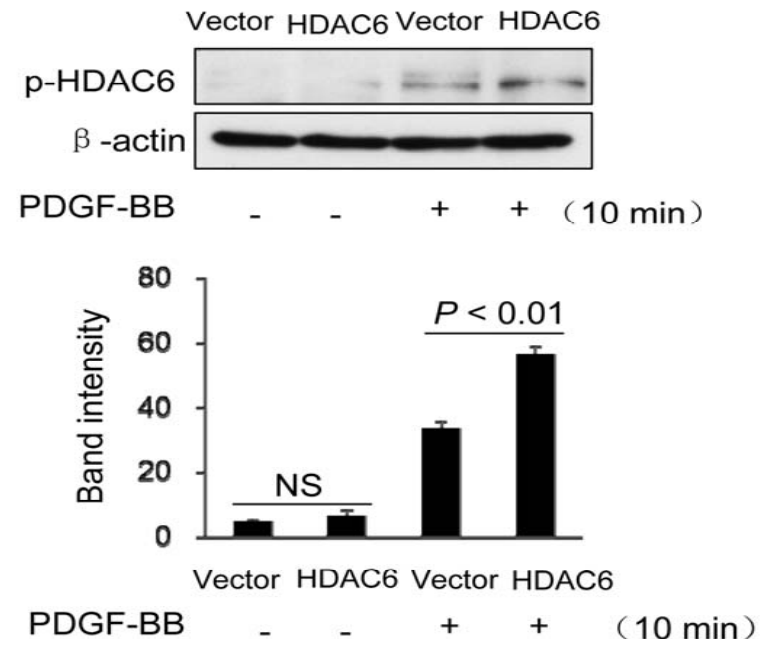

### Sup. Fig. X

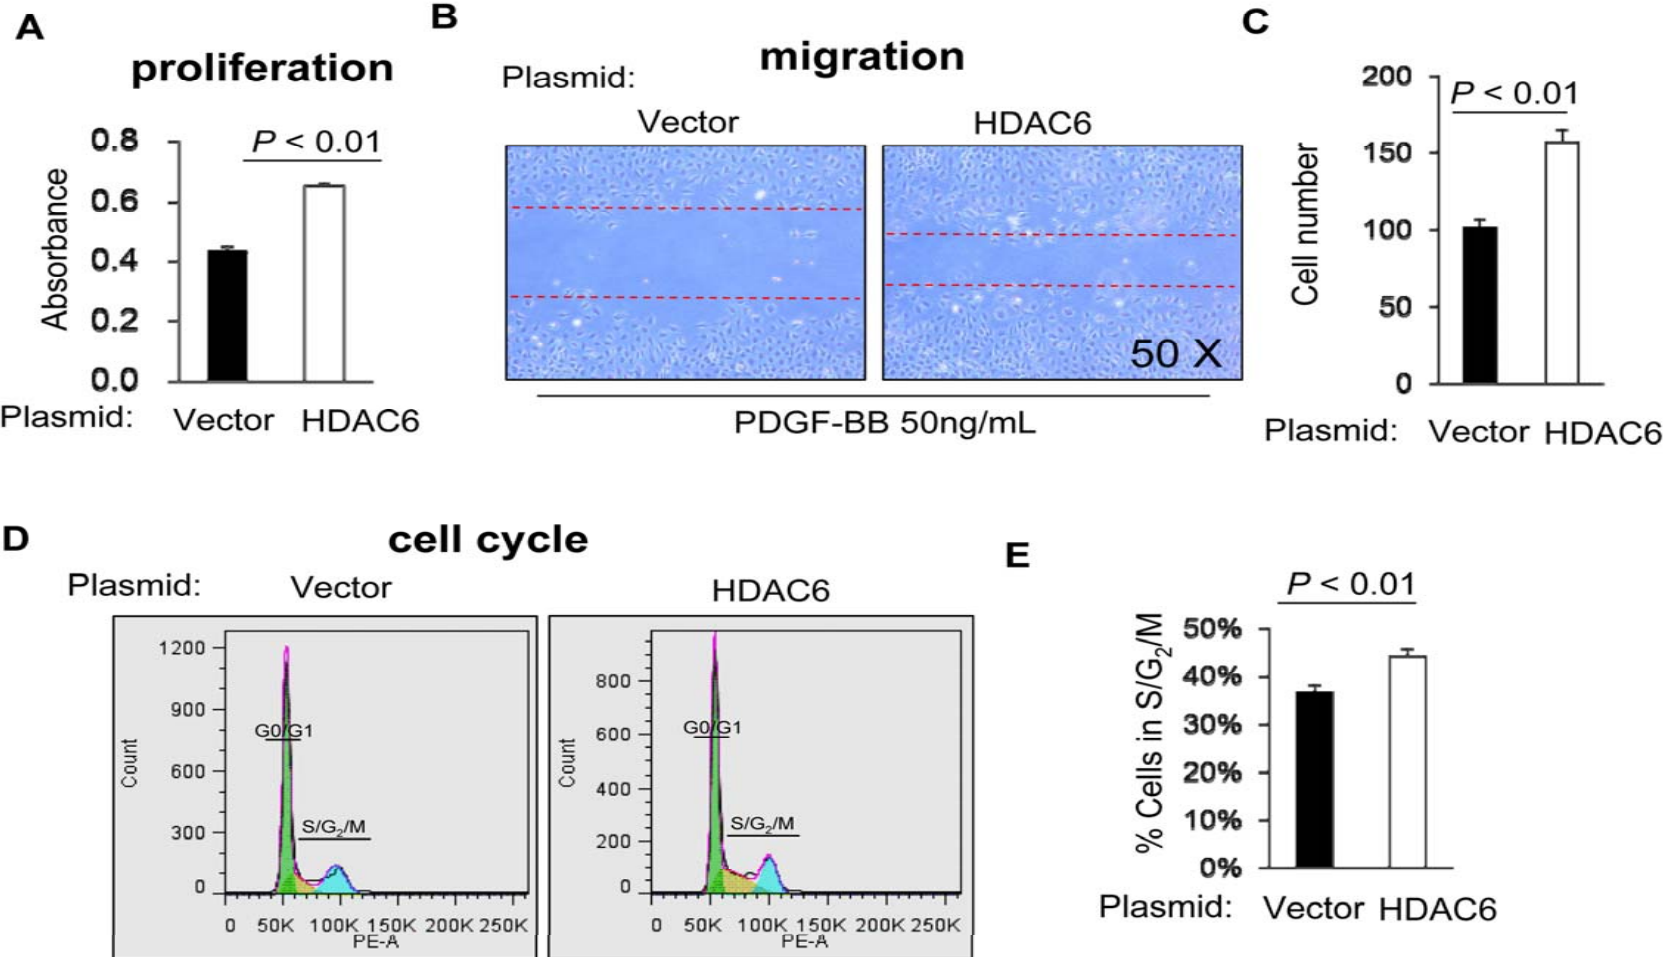



## Sup. Fig. XI

**A**

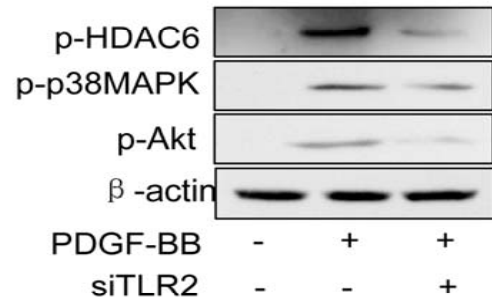

**B**

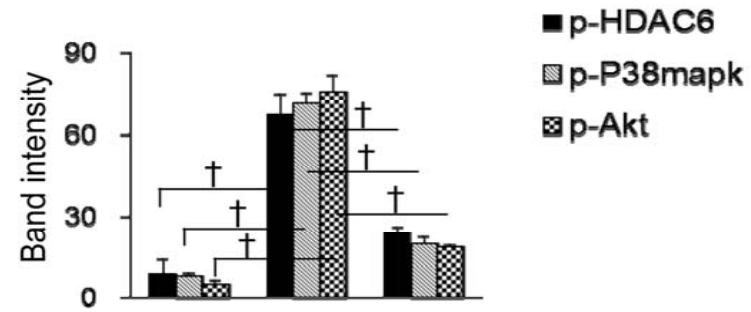

**C**

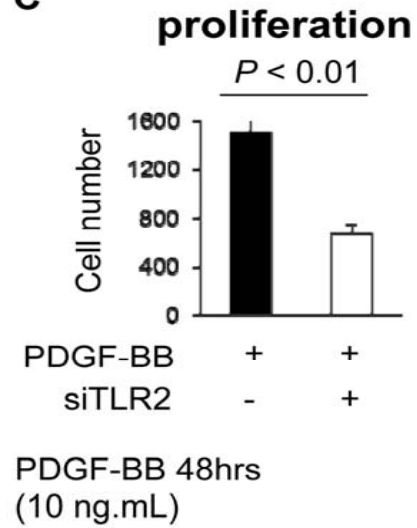

**D**

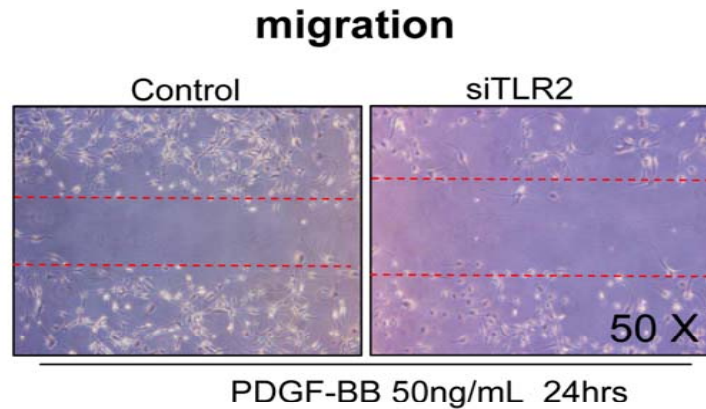

**E**

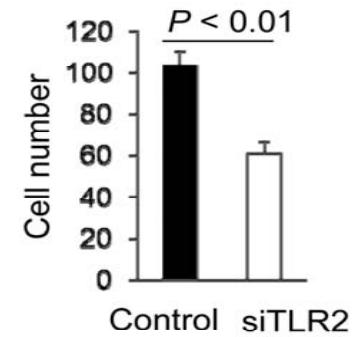



Sup. Fig. XII

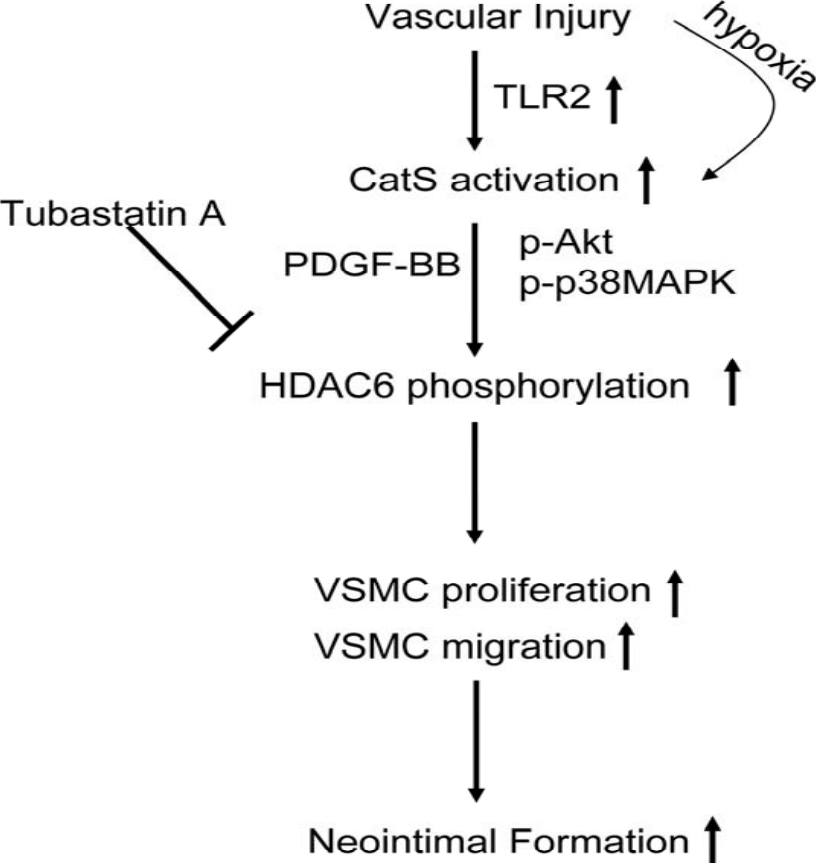

Supplement: atv-36-1549-s002.pdf [file atv-36-1549-s002.pdf]
