# Supplementary figures and images for: Cathepsin S Activity Controls Injury-Related Vascular Repair in Mice via the TLR2-Mediated p38MAPK and PI3K−Akt/p-HDAC6 Signaling Pathway
Source: PubMed Central journal article supplement — Arterioscler Thromb Vasc Biol. 2016 Jul 27;36(8):1549–57. doi: 10.1161/ATVBAHA.115.307110 (PMC4961274; doi:10.1161/atvbaha.115.307110), 2016-07-27

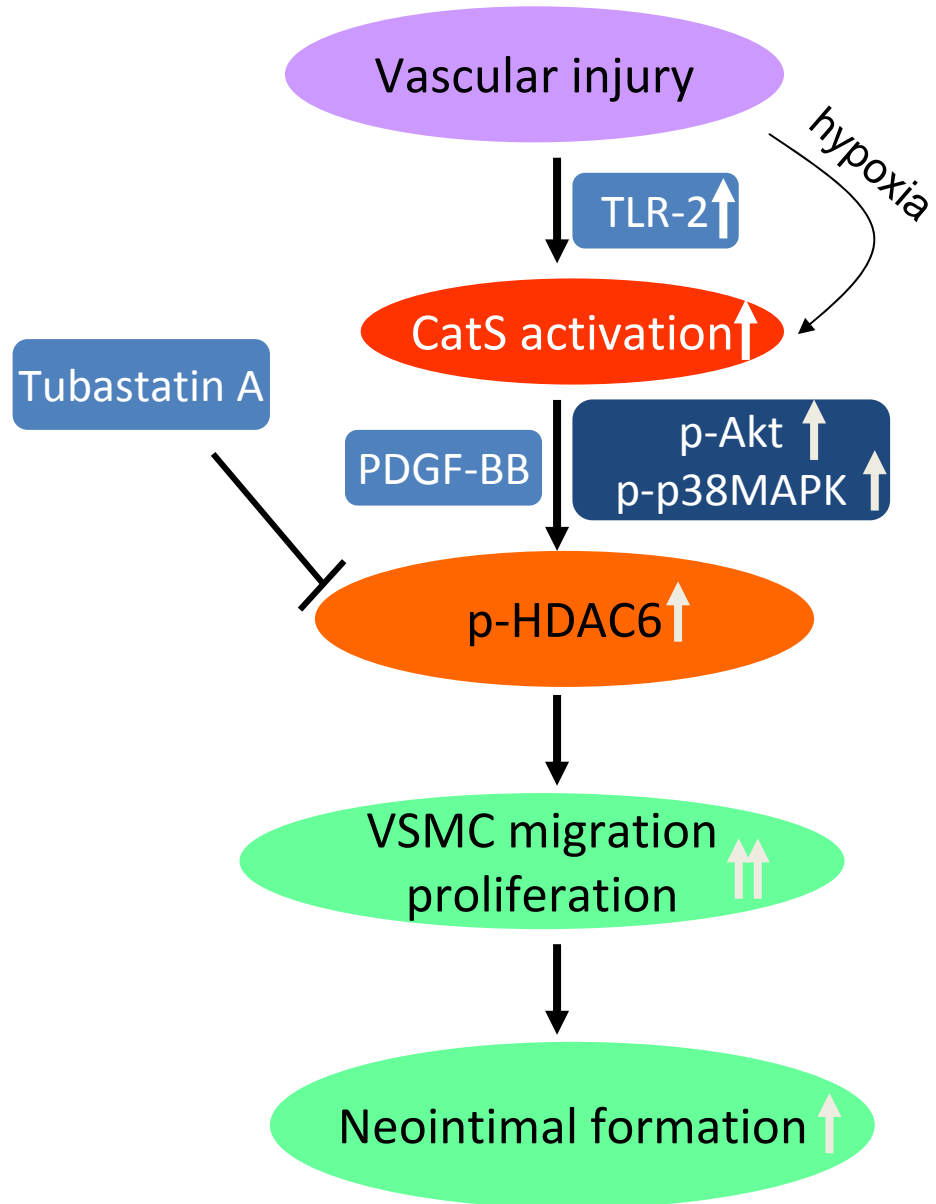

Supplement: atv-36-1549-s003.pdf [file atv-36-1549-s003.pdf]
